# Supplementary material
Source: PubMed Central journal article supplement (PMC3720085)
Supplement: aja2011183x1.pdf [file aja2011183x1.pdf]

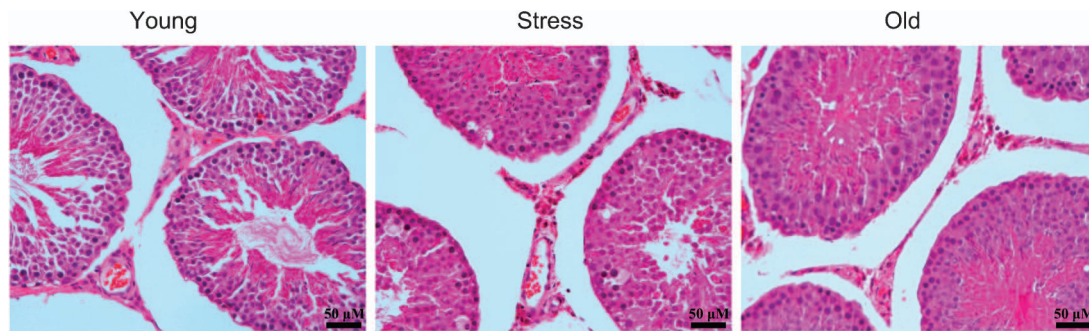

**Supplemental Figure 1** Hematoxylin and eosin-stained sections of testis from young (6-month-old), chronically stress and old Brown Norway rats (21-month-old). Leydig cells are the group of cells adjacent to and between the seminiferous tubules.

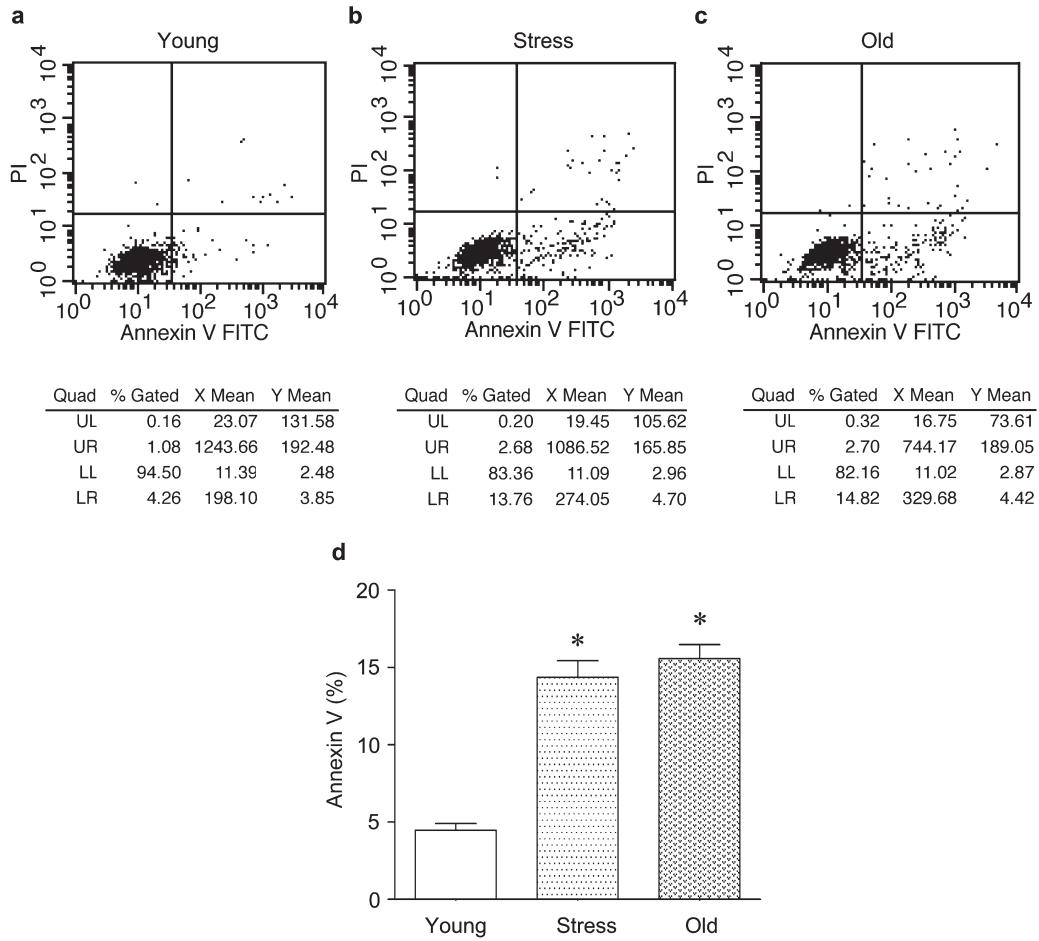

**Supplemental Figure 2** Flow cytometric analysis of apoptotic Leydig cells labelled with Annexin-V-FITC in young (6-month-old), chronically stressed and old (21-month-old) Brown Norway rats. (a-c) Representative flow cytometric data for Leydig cells from young, chronically stressed and old rats. (d) The apoptotic frequency of
